# Supplementary figures and images for: Adaptation and Testing of the Factorial Structure of the Physical Education Grit Scale for Use in Secondary Education in Spain
Source: MDPI journal article supplement (doi:10.3390/ijerph191610008), 2022-08-13

## Supplementary Materials

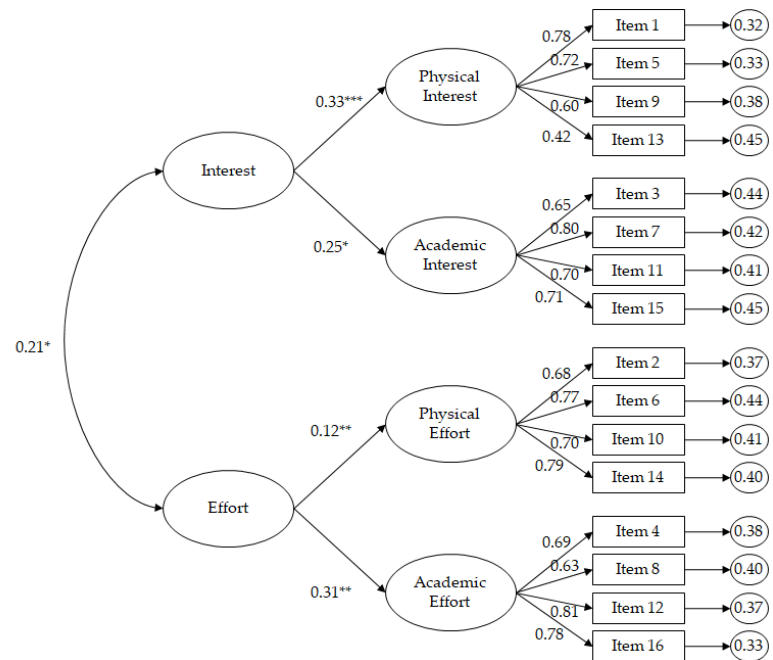

## Supplementary Model S1

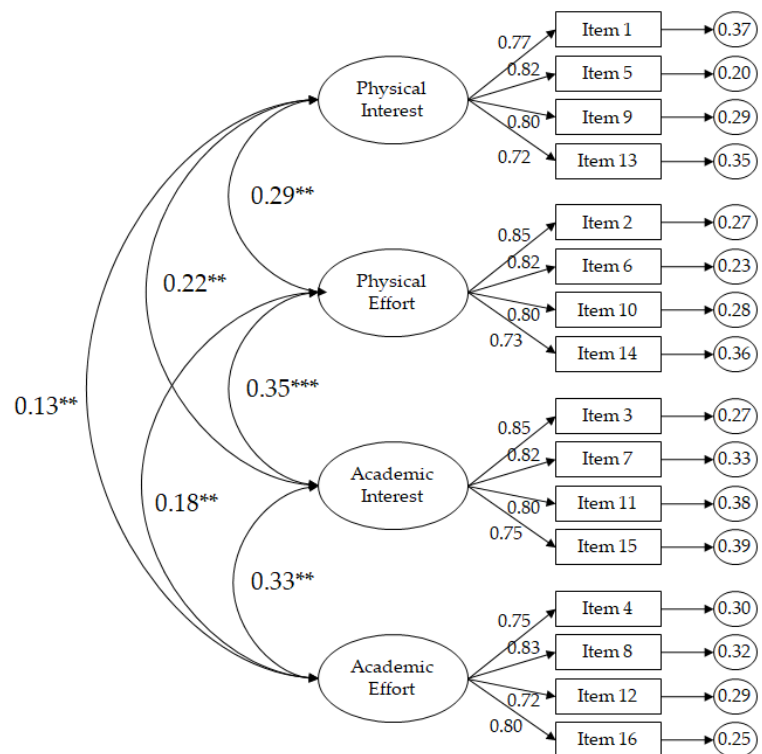

## Supplementary Model S2

Supplement: s1 [file s1]
